# Supplementary material
Source: publisher figshare collection journal article supplement (https://acs.figshare.com/ndownloader/files/3990181)
Supplement: Supplementary file 1 [file 3990181]

# A Novel Sequential Injection Method for Rapid and Simultaneous Determination of $^{236}\text{U}$ , $^{237}\text{Np}$ and Plutonium isotopes in Seawater

*Jixin Qiao<sup>a,\*</sup>, Xiaolin Hou<sup>a,b</sup>, Peter Steier<sup>c</sup>, Robin Golser<sup>c</sup>*

<sup>a</sup> Center of Nuclear Technologies, Technical University of Denmark, DTU Risø Campus, DK-4000 Roskilde, Denmark

<sup>b</sup> Xi'an AMS Center and SKLLQG, Institute of Earth Environment, Chinese Academy of Science, Xi'an, China

<sup>c</sup> VERA Laboratory, Faculty of Physics – Isotope Research and Nuclear Physics, University of Vienna, Währinger Straße 17, A-1090 Vienna, Austria

---

\*To whom correspondence should be addressed. Tel: 45 46775357. E-mail: [jjqi@dtu.dk](mailto:jjqi@dtu.dk)

This Supporting Information describes the details of experimental operations including sample pre-treatment and chromatographic separations. It also contains one Figure and two Tables.

## **EXPERIMENTAL**

### **Sample pre-treatment**

To optimize the iron hydroxide co-precipitation condition, 200 mL of seawater sample spiked with known amounts of  $^{242}\text{Pu}$  (ca. 10 mBq) and  $^{237}\text{Np}$  (ca. 1 mBq) was used and 0.2-2 mL of conc. HCl was added to acidify the seawater to 0.9-1.9. 0.03-0.2 mL of 0.1 g/mL Fe (in the form of  $\text{FeCl}_3$ ) was added to a Fe concentration of 15-100 mg/L. Unless otherwise stated, the sample was stirred for 20 minutes with nitrogen bubbling after addition of 600 mg of  $\text{K}_2\text{S}_2\text{O}_5$ . 6 mol/L NaOH was added to adjust the pH to 10-11 and the supernatant was discarded after centrifuging the sample at 4000 rpm for 10 minutes. The residue was dissolved with 2 mol/L HCl and 110 mg of  $\text{K}_2\text{S}_2\text{O}_5$  was added. Conc.  $\text{NH}_3\cdot\text{H}_2\text{O}$  was added to adjust the pH to 8-9 and the sample was centrifuged. After discarding the supernatant, the residue was dissolved with 2 mol/L HCl to 10 mL.

To further optimize the pre-concentration procedure for 10 L filtrated seawater, 10 mL of conc. HCl was added to adjust pH to 2. Known amounts of  $^{237}\text{Np}$  and  $^{242}\text{Pu}$  were spiked. 2-5 mL of 0.1 g/mL Fe solution (corresponding to 20-100 mg/L Fe in 10 L seawater) and 2-20 g of  $\text{K}_2\text{S}_2\text{O}_5$  were added. The sample was stirred by  $\text{N}_2$  bubbling for 20 minutes, then a two-step co-precipitation or one-step co-precipitation combining acid digestion was applied depending on the experimental conditions (see Table 1). In the two-step co-precipitation, 6 mol/L NaOH was added to adjust the pH to 10-11. The sample was kept still overnight, and then the supernatant was discarded. Conc. HCl was added to dissolve the residue and conc.  $\text{NH}_3\cdot\text{H}_2\text{O}$  was added to adjust pH to 8-9. The sample slurry was centrifuged at 4000 rpm for 5 minutes and the

supernatant was poured away. The residue was dissolved with conc.  $\text{HNO}_3$  and the sample was finally constituted to 3 mol/L  $\text{HNO}_3$  for the automated chromatographic separation.

In the one-step co-precipitation, 10%  $\text{NH}_3\cdot\text{H}_2\text{O}$  was slowly added to adjust the pH to 8-9 and 40 g of NaCl was then added with vigorously  $\text{N}_2$  bubbling. The sample was kept still for 0.5-1 h, and then the supernatant was discarded. The sample slurry was centrifuged at 4000 rpm for 5 minutes and the supernatant was discarded. Afterwards, acid digestion was performed to decompose the organic substances/colloids contained in the precipitate. In detail, the residue was dissolved with 40 ml of *aqua regia* and boiled on a hotplate at 200 °C for 2 h. After cool down, the sample was filtrated with a GA/F filter paper, the filter paper and the beaker were washed with 30 mL of 0.2 mol/L HCl and combined into the filtrate. Conc.  $\text{NH}_3\cdot\text{H}_2\text{O}$  was then added to adjust the pH to 8-9 and the sample was centrifuged at 4000 rpm for 10 minute. The residue was dissolved with 3 mL of conc. HCl and the solution was diluted to ca. 200 mL with water. 500 mg of  $\text{K}_2\text{S}_2\text{O}_5$  was added and sample was stirred for 20 minutes. 10%  $\text{NH}_3\cdot\text{H}_2\text{O}$  was added to pH 8-9 and the sample was centrifuged at 4000 rpm for 10 minutes. After discarding the supernatant, the residue was firstly dissolved in 1-2 mL of conc. HCl and then with conc.  $\text{HNO}_3$ . The sample was finally adjusted to 3 mol/L  $\text{HNO}_3$  for the automated chromatographic separation.

### **Chromatographic separation**

#### ***Investigation on separation behaviour of radionuclides on UTEVA column***

An artificial solution in HCl or  $\text{HNO}_3$  media spiked with ca. 0.5 mBq of  $^{237}\text{Np}$ , 5 mBq of  $^{242}\text{Pu}$ , 62  $\mu\text{Bq}$  (5 ng) of  $^{238}\text{U}$ , 20  $\mu\text{Bq}$  (5 ng) of  $^{232}\text{Th}$  and 30 mg of Fe was prepared. A freshly packed 1-mL (0.5 cm i.d.  $\times$  5 cm length) UTEVA column was used during the investigation, which was preconditioned with acidic solution identical to the sample loading media prior to the column separation.

Condition A: 200 mg of ascorbic acid was added to a 5-mL artificial solution in 6 mol/L HCl. The sample was loaded onto the UTEVA column. The column was rinsed with 10 mL of 0.1 mol/L  $\text{NH}_2\text{OH}\cdot\text{HCl}$ -6 mol/L HCl and uranium was finally eluted with 10 mL of 0.025 mol/L HCl.

Condition B: 200 mg of ascorbic acid and 100 mg of  $\text{NaNO}_2$  were sequentially added to a 5-mL artificial solution in 2 mol/L  $\text{HNO}_3$ . The sample was loaded onto the UTEVA column, which was then rinsed with 10 mL of 2 mol/L  $\text{HNO}_3$  and 10 mL of 6 mol/L HCl. Plutonium and neptunium were eluted with 10 mL of 0.1 mol/L  $\text{NH}_2\text{OH}\cdot\text{HCl}$ -2 mol/L HCl. Uranium was finally eluted with 10 mL of 0.025 mol/L HCl.

Condition C: 200 mg of ascorbic acid and 100 mg of  $\text{NaNO}_2$  were sequentially added to 5-mL of artificial solution in 3 mol/L  $\text{HNO}_3$ . The sample was loaded onto the UTEVA column. The column was rinsed with 10 mL of 3 mol/L  $\text{HNO}_3$  and 10 mL of 6 mol/L HCl. Plutonium and neptunium were eluted with 10 mL of 0.1 mol/L  $\text{NH}_2\text{OH}\cdot\text{HCl}$ -2 mol/L HCl. Uranium was finally eluted with 10 mL of 0.025 mol/L HCl.

Condition D: 200 mg of ascorbic acid and 100 mg of  $\text{NaNO}_2$  were sequentially added to a 5-mL of artificial solution in 2 mol/L  $\text{HNO}_3$ . 0.2 g of  $\text{Al}(\text{NO}_3)_3$  was added to the sample which was then loaded onto the UTEVA column. The column was sequentially rinsed with 20 mL of 2 mol/L  $\text{HNO}_3$ , 20 mL of 6 mol/L HCl and 20 mL of 6 mol/L HCl-0.05 mol/L  $\text{H}_2\text{C}_2\text{O}_4$ . Uranium was eluted with 20 mL of 0.025 mol/L HCl.

All effluents, washes and eluates from the column separation were collected in 5-10 ml fractions, evaporated to dryness, and finally re-constituted in 5 mL of 0.5 mol/L  $\text{HNO}_3$  for quantification of  $^{237}\text{Np}$ ,  $^{242}\text{Pu}$ ,  $^{232}\text{Th}$  and  $^{238}\text{U}$  with ICP-MS.

***Investigation on separation performance of TEVA-UTEVA column***

To investigate the effect of nitric acid concentration on the separation behaviour of stacked TEVA-UTEVA, 100 mL of 0.2 mol/L HCl was spiked with ca. 20 mBq of  $^{242}\text{Pu}$ , 1.0 Bq (80  $\mu\text{g}$ ) of  $^{238}\text{U}$  and 800 mg of Fe. 500 mg of  $\text{K}_2\text{S}_2\text{O}_5$  was added and the sample was stirred for 20 minutes. 6 mol/L NaOH was added to adjust the pH to 9-10 and the sample was centrifuged at 4000 rpm for 10 minutes. The supernatant was discarded and the precipitate was dissolved with conc.  $\text{HNO}_3$  to a final concentration of 4 mol/L  $\text{HNO}_3$ , and 200 mg of  $\text{NaNO}_2$  was added. The sample (ca. 20 mL) was evenly divided into four sub-samples by weight, three of which were diluted with de-ionized water to 1, 2 and 3 mol/L  $\text{HNO}_3$ , respectively. Each sub-sample was loaded manually onto a stacked TEVA-UTEVA column (both were 1 mL volume), which was then rinsed with 100 mL of  $\text{HNO}_3$  of identical concentration to the sample loading solution. After splitting the stacked TEVA-UTEVA column, plutonium was eluted from TEVA with 50 mL of 0.1 mol/L  $\text{NH}_2\text{OH}\cdot\text{HCl}$ -2 mol/L HCl, while uranium was eluted from UTEVA with 50 mL of 0.025 mol/L HCl. Effluents, washes and eluates were collected in 5-10 mL fractions, evaporated to dryness, and finally reconstituted in 5 mL of 0.5 mol/L  $\text{HNO}_3$  for quantification of  $^{237}\text{Np}$  and  $^{242}\text{Pu}$  with ICP-MS.

## FIGURE CAPTIONS

**Figure S-1.** Effect of pH (a) and iron concentration (b) in seawater on the co-precipitation efficiency of uranium, neptunium and plutonium (> 100% chemical yields for U, Pu and Np might be consequences of artifact of matrix effects in the ICP-MS measurement)

Figure S-1.

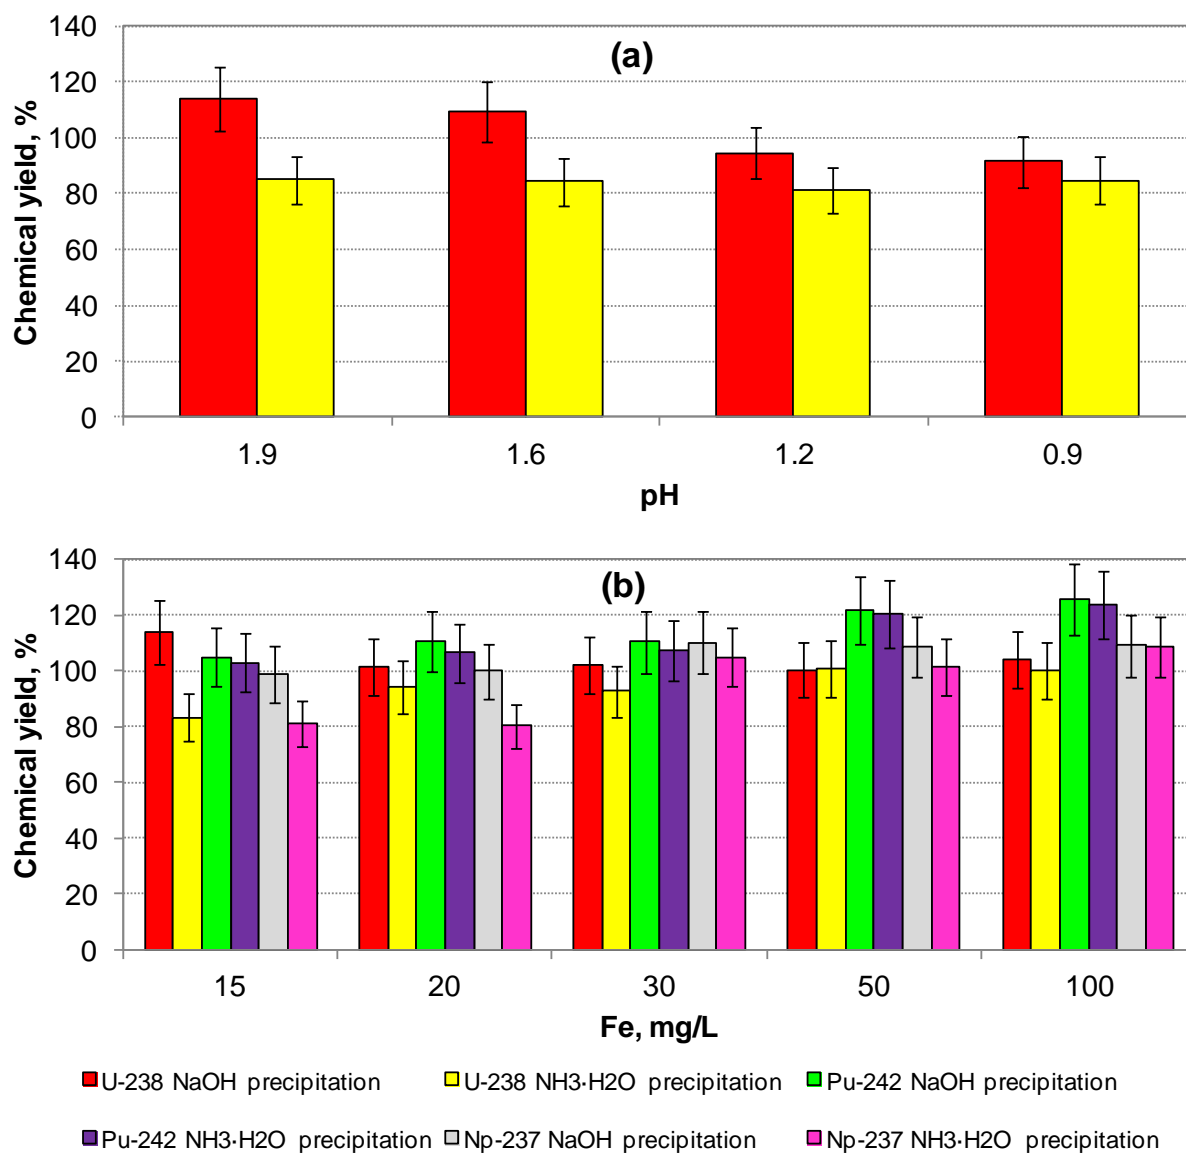

# TABLES

**Table S-1.** Sorption and elution behaviour of thorium, uranium, neptunium and plutonium on UTEVA resin\*

| Experimental condition | Sample loading medium    | Valence adjustment reagents   | Loading, washing and eluting solution                                            | Chemical yield, % |                   |                  |                   |
|------------------------|--------------------------|-------------------------------|----------------------------------------------------------------------------------|-------------------|-------------------|------------------|-------------------|
|                        |                          |                               |                                                                                  | <sup>232</sup> Th | <sup>237</sup> Np | <sup>238</sup> U | <sup>242</sup> Pu |
| A                      | 6 mol/L HCl              | 200 mg of ascorbic acid       | 5 mL of sample loading solution in 6 mol/L HCl                                   | 34.5              | 43.1              | 0.4              | 93.2              |
|                        |                          |                               | 10 mL of 0.1 mol/L NH <sub>2</sub> OH·HCl-6 mol/L HCl                            | 64.7              | 2.2               | 0.2              | 6.8               |
|                        |                          |                               | 10 mL of 0.025 mol/L HCl                                                         | 0.8               | 54.7              | 99.4             | 0.0               |
| B                      | 2 mol/L HNO <sub>3</sub> | 200 mg of ascorbic acid +     | 5 mL of sample loading solution in 2 mol/L HNO <sub>3</sub>                      | 0.5               | 42.9              | 0.0              | 3.9               |
|                        |                          |                               | 10 mL of 2 mol/L HNO <sub>3</sub>                                                | 3.3               | 7.5               | 0.0              | 0.2               |
|                        |                          | 100 mg of NaNO <sub>2</sub>   | 10 mL of 6 mol/L HCl                                                             | 90.9              | 0.0               | 0.2              | 0.0               |
|                        |                          |                               | 10 mL of 0.1 mol/L NH <sub>2</sub> OH·HCl-6 mol/L HCl                            | 5.2               | 0.0               | 0.1              | 2.1               |
|                        |                          |                               | 10 mL of 0.025 mol/L HCl                                                         | 0.1               | 49.6              | 99.6             | 93.8              |
| C                      | 3 mol/L HNO <sub>3</sub> | 200 mg of ascorbic acid +     | 5 mL of sample loading solution in 3 mol/L HNO <sub>3</sub>                      | 0.5               | 3.4               | 0.0              | 2.3               |
|                        |                          |                               | 10 mL of 3 mol/L HNO <sub>3</sub>                                                | 5.8               | 3.9               | 0.2              | 0.1               |
|                        |                          | 100 mg of NaNO <sub>2</sub>   | 10 mL of 6 mol/L HCl                                                             | 89.9              | 2.8               | 0.8              | 0.0               |
|                        |                          |                               | 10 mL of 0.2 mol/L NH <sub>2</sub> OH·HCl-6 mol/L HCl                            | 0.3               | 86.2              | 97.0             | 97.7              |
|                        |                          |                               | 10 mL of 0.025 mol/L HCl                                                         | 3.5               | 3.4               | 1.9              | 0.0               |
| D                      | 2 mol/L HNO <sub>3</sub> | 200 mg of ascorbic acid +     | 5 mL of sample loading solution in 2 mol/L HNO <sub>3</sub>                      | 7.9               | 60.5              | 0.0              | 4.3               |
|                        |                          |                               | 0-10 mL of 2 mol/L HNO <sub>3</sub>                                              | 5.2               | 26.9              | 0.0              | 5.6               |
|                        |                          | 100 mg of NaNO <sub>2</sub> # | 10-20 mL of 2 mol/L HNO <sub>3</sub>                                             | 6.0               | 2.7               | 0.0              | 1.1               |
|                        |                          |                               | 0-10 mL of 6 mol/L HCl                                                           | 50.4              | 0.2               | 0.0              | 0.1               |
|                        |                          |                               | 10-20 mL of 6 mol/L HCl                                                          | 4.9               | 11.5              | 0.1              | 8.8               |
|                        |                          |                               | 0-10 mL of 0.05 mol/L H <sub>2</sub> C <sub>2</sub> O <sub>4</sub> -6 mol/L HCl  | 13.1              | 0.0               | 0.2              | 6.8               |
|                        |                          |                               | 10-20 mL of 0.05 mol/L H <sub>2</sub> C <sub>2</sub> O <sub>4</sub> -6 mol/L HCl | 6.4               | 0.1               | 1.1              | 16.5              |
|                        |                          |                               | 0-10 mL of 0.025 mol/L HCl                                                       | 1.9               | 0.1               | 95.0             | 55.2              |
|                        |                          |                               | 10-20 mL of 0.025 mol/L HCl                                                      | 0.1               | 0.1               | 1.2              | 0.0               |
|                        |                          |                               | Ashed UTEVA                                                                      | 4.1               | 0.0               | 2.4              | 1.5               |

\*The uncertainties of all values are < 10%.

# Before sample loading, 0.2 g of Al(NO<sub>3</sub>)<sub>3</sub> was added to increase [NO<sub>3</sub><sup>-</sup>] without changing [H<sup>+</sup>].



**Table S-2.** The programmable operations and positions of valves in the SI analyzer for chromatographic separation of uranium, neptunium and plutonium with TEVA and UTEVA

| Step no.                          | Operation of syringe pump                                                   | Flow rate,<br>mL/min | Valve Position       |                   |                   |
|-----------------------------------|-----------------------------------------------------------------------------|----------------------|----------------------|-------------------|-------------------|
|                                   |                                                                             |                      | INV <sup>&amp;</sup> | SV-1 <sup>#</sup> | SV-2 <sup>#</sup> |
| I                                 | 1) aspirate 25 mL of deionised water*                                       | 12.0                 | 1                    | 1                 | 1                 |
|                                   | 2) dispense 25 mL of deionised water                                        | 6.0                  | 1                    | 8                 | 1                 |
|                                   | 3) aspirate 1 mL air                                                        | 6.0                  | 1                    | 1                 | 1                 |
|                                   | 4) aspirate 15 mL of 3 mol/L HNO <sub>3</sub>                               | 12.0                 | 1                    | 3                 | 1                 |
|                                   | 5) dispense 5mL of 3 mol/L HNO <sub>3</sub>                                 | 6.0                  | 1                    | 7                 | 1                 |
|                                   | 6) dispense 5 mL of 3 mol/L HNO <sub>3</sub>                                | 6.0                  | 1                    | 9                 | 4                 |
|                                   | 7) dispense 5 mL of 3 mol/L HNO <sub>3</sub>                                | 6.0                  | 1                    | 8                 | 4                 |
| II                                | 8) aspirate 20 mL of 3 mol/L HNO <sub>3</sub>                               | 12.0                 | 1                    | 3                 | 4                 |
|                                   | 9) dispense 20 mL of 3 mol/L HNO <sub>3</sub> to TEVA-UTEVA                 | 3.0                  | 2                    | 8                 | 4                 |
| III                               | 10) aspirate the sample solution (ca. 20 mL)                                | 3.6                  | 2                    | 7                 | 4                 |
|                                   | 11) dispense the sample solution (ca. 20 mL) onto connected TEVA-UTEVA      | 1.2                  | 2                    | 8                 | 4                 |
| IV                                | 12) aspirate 20 mL of 3 mol/L                                               | 12.0                 | 2                    | 3                 | 4                 |
|                                   | 13) dispense 20 mL of 3 mol/L to connected TEVA-UTEVA                       | 1.2                  | 2                    | 8                 | 4                 |
| V                                 | 14) aspirate 20 mL of 1 mol/L                                               | 12.0                 | 2                    | 2                 | 4                 |
|                                   | 15) dispense 20 mL of 1 mol/L to connected TEVA-UTEVA                       | 1.2                  | 2                    | 8                 | 4                 |
| Repeat step 12-13 for three times |                                                                             |                      |                      |                   |                   |
| VI                                | 16) aspirate 20 mL of 1 mol/L HNO <sub>3</sub>                              | 12.0                 | 2                    | 2                 | 4                 |
|                                   | 17) dispense 20 mL of 1 mol/L HNO <sub>3</sub> to TEVA                      | 2.4                  | 1                    | 9                 | 3                 |
|                                   | 18) aspirate 20 mL of 6 mol/L HCl                                           | 12.0                 | 1                    | 4                 | 3                 |
|                                   | 19) dispense 20 mL of 6 mol/L HCl to TEVA                                   | 2.4                  | 1                    | 9                 | 3                 |
| VII                               | 20) aspirate 20 mL of 0.1 mol/L NH <sub>2</sub> OH·HCl -2 mol/L HCl         | 12.0                 | 1                    | 6                 | 3                 |
|                                   | 21) dispense 20 mL of 0.1 mol/L NH <sub>2</sub> OH·HCl -2 mol/L HCl to TEVA | 1.2                  | 1                    | 9                 | 4                 |
|                                   | 22) aspirate 20 mL of 0.025 mol/L HCl                                       | 12.0                 | 1                    | 5                 | 4                 |
|                                   | 23) dispense 20 mL of 0.025 mol/L HCl                                       | 1.2                  | 1                    | 10                | 4                 |

\*Only for operation, the solenoid valve (SV-3) located at the head of the syringe pump is assigned to 'in' position; for all the other operations, SV-3 is always at 'out' position. & position 1: port 1 and 2, port 3 and 4, port 5 and 6, port 7 and 8, and port 9 and 10, are connected respectively; position 1: port 1 and 10, port 2 and 3, port 4 and 5, port 6 and 7, and port 8 and 9 are connected, respectively. #position no. *x* means that, the central port of the selection valve is connected with the ambient port no. *x*.
